1 **GGDB: A Gramineae Genome Alignment Database of Homologous**  
2 **Genes Hierarchically Related to Evolutionary Events**

3

4 Qihang Yang<sup>1</sup>, Tao Liu<sup>1</sup>, Tong Wu<sup>1</sup>, Tianyu Lei<sup>1</sup>, Yuxian Li<sup>1</sup>, Xiyin Wang<sup>1\*</sup>

5

6 <sup>1</sup>Center for Genomics and Bio-computing, North China University of Science and  
7 Technology, Tangshan, Hebei 063210, China;

8

9 \*To whom correspondence should be addressed. Tel: 86-315-8805592; Fax:  
10 86-315-8805592; Email: [wangxiyin@vip.sina.com](mailto:wangxiyin@vip.sina.com)

11

12

13 **ABSTRACT**

14 Owing to their economic values, Gramineae plants have been  
15 preferentially sequenced their genomes. These genomes are often quite  
16 complex, e.g., harboring many duplicated genes, which were the main  
17 source of genetic innovation and often the results of recurrent  
18 polyploidization. Deciphering the complex genome structure and linking  
19 duplicated genes to specific polyploidization events are important to  
20 understand the biology and evolution of plants. However, the effort has  
21 been held back due to its high complexity in analyzing these genomes.  
22 Here, by hierarchically relating duplicated genes in colinearity to each  
23 polyploidization or speciation event, we analyzed 29 well-assembled and  
24 up-to-date Gramineae genome sequences, separated duplicated genes  
25 produced by each event, established lists of paralogous and orthologous

26 genes, and eventually constructed an on-line database, GGDB  
27 (<http://www.grassgenome.com/>). Homologous gene lists from each plant  
28 and between them can be displayed, searched, and downloaded from the  
29 database. Interactive comparison tools were deployed to demonstrate  
30 homology among user-selected plants, to draw genome-scale or local  
31 alignment figures, phylogenetic trees of genes corrected by exploiting  
32 gene colinearity, etc. Using these tools and figures, users can easily  
33 observe genome structural changes, and explore the effects of  
34 paleo-polyploidy on crop genome structure and function. The GGDB will  
35 be a useful platform to improve understanding the genome changes and  
36 functional innovation of Gramineae plants.

37

38 **Keywords:** Gramineae; Colinearity; Polyploidy; Homologous gene;  
39 Database

40

41 **Key points:**

- 42 1. GGDB is the only portal hosting Grameneae colinear homologous  
43 genes hierarchically related to evolutionary events, especially  
44 polyploidization, which have occurred recursively.
- 45 2. Allows systematic analysis of colinear gene relationships and function  
46 origination and/or divergence across Grameneae plants.
- 47 3. Serving the Grameneae research community, with new genomes,  
48 modules, tools, and analysis.

## 49 INTRODUCTION

50 Gramineae is a large group of monocotyledonous flowering  
51 plants, which can be divided into more than 620 genera and more  
52 than 10000 species, covering 20% of the land area of the earth<sup>[1]</sup>.  
53 Gramineae contains many important food crops, such as wheat  
54 (*Triticum aestivum*), rice (*Oryza sativa*), corn (*Zea mays*), sorghum  
55 (*Sorghum bicolor*), and so on<sup>[2-5]</sup>. With the tens of Gramineae  
56 genomes being sequenced, it provides a solid data basis for  
57 in-depth analysis of functional innovation and evolution of  
58 Gramineae genomes.

59 The study of the Gramineae genomes revealed repeated  
60 polyploidy events during the evolutionary history<sup>[6-8]</sup>. Polyploidy  
61 is an abrupt event, which can create a new species with doubled  
62 number of chromosomes, produce a large number of repetitive  
63 genes<sup>[9-11]</sup>, trigger large-scale reorganization of biological  
64 functions, such as regulatory network re-programming and  
65 debugging. Polyploidy leads to genomic instability, and a  
66 considerable amount of gene loss may occur<sup>[12; 13]</sup>. Gramineae  
67 plants could be taken as a good example in that their common  
68 ancestor was affected by a tetraploidization ~100 million years ago,  
69 followed by the fast originization and divergence of derivative  
70 plants<sup>[14-16]</sup>. Gramineae crops, such as wheat and maize, were

71 resulted from further polyploidization event(s). Recursive  
72 polyploidization and genome reorganization makes their genomes  
73 rather complex <sup>[17-19]</sup>.

74 Gene colinearity provides precious means to study complex  
75 genomic structures. In extant genomes, a considerable number of  
76 colinear genes produced by polyploidy have been retained <sup>[20]</sup>. In  
77 rice genome, there still remain thousands of colinear genes,  
78 resulted from the Gramineae-common tetraploidization <sup>[21; 22]</sup>. The  
79 analysis of colinear genes helps identify ancient polyploidy events,  
80 deduce the scale and time of their occurrence, and infer gene  
81 functional changes <sup>[23; 24]</sup>.

82 In that the importance of gene colinearity, the information was  
83 often inferred and stored in biological databases, such as JCVI,  
84 PGDD, and COGE<sup>[25-27]</sup>. However, the gene colinearity  
85 information in these existing databases has non-negligible  
86 shortcomings. First, colinear genes were not related to specific  
87 polyploidy events due to methodological difficulty to analyze these  
88 recursive events. Second, only two or three species were involved  
89 to infer gene colinearity, hampering the efforts to do genus- or  
90 family-scale level evolutionary or functional analysis.

91 Here, by integrating approaches of homologous gene  
92 dotplotting to compare genomes, characterizing divergence levels

93 of colinear gene homologs, and checking complement patterns of  
94 chromosome breakages, colinear homologs produced by different  
95 polyploidies (or speciation) could be separated, and hierarchically  
96 related to each relative event [28; 29]. Then, we implemented the  
97 above mentioned hierarchical gene colinearity inference  
98 approaches with the Gramineae plants, and thus using the results  
99 established the Gramineae Genome Alignment Database GGDB  
100 (<http://www.grassgenome.com/>), which contains gene colinearity  
101 information to explore the chromosome changes, genomic  
102 repatterning, and the actual phylogeny of duplicated genes<sup>[30; 31]</sup> at  
103 the Gramineae family-scale level.

## 104 **MATERIALS AND METHODS**

105 We summarize the species information contained in GGDB, the way  
106 of data processing, and the composition structure of webpages (Fig.1A-B).  
107 The database is constructed by using MySQL to store analysis results<sup>[32-34]</sup>,  
108 such as colinear gene lists, chromosome homology within a genome or  
109 between genomes, figures to show homolog between genomes, etc. The  
110 website was developed by using HTML and PHP. Data was analyzed by  
111 using scripts developed by Python and R<sup>[35-38]</sup>.

### 112 **Data sources**

113 In determining whether a species should be included in the GGDB or  
114 not, we require its genome to be assembled to the chromosome-level,

115 allowing credible gene colinearity inference. If multiple genome  
116 assemblies are available, we use the latest assembly version in the  
117 database<sup>[39-41]</sup>. Most genome data was downloaded from the NCBI  
118 database (<https://www.ncbi.nlm.nih.gov/>) and the JGI database  
119 (<https://phytozome-next.jgi.doe.gov/>) (Table 1). Genome data was  
120 preprocessed by using home-made Perl scripts: (i) uniform format of gene  
121 names was adopted; (ii) redundant information in the genome annotation  
122 is removed; (iii) gene location files was extracted, including the  
123 information of chromosome numbers, gene IDs, gene locations and  
124 orders on chromosomes, etc.

### 125 **Inferring colinear genes**

126 Sequence similarity alignment software BLAST+ was used to infer  
127 putative homologous genes (BLAST E-value  $\leq 10^{-5}$  and sequence  
128 matching score  $\geq 100$ ). Homologous gene dotplots were drawn, in that  
129 they are helpful to show and infer homology and structural changes  
130 within a genome or between genomes. In a homologous gene dotplot,  
131 dots represent homologous gene pairs and are often assigned with  
132 different colors, to show sequence divergence levels between compared  
133 homologous genes.

134 Colinear genes within and between genomes of Gramineae were  
135 inferred by using software ColinearScan<sup>[42]</sup>, using the above BLAST  
136 inferred putative homologs, with BLAST accumulated hit scores  $\geq 50$  of

137 homologous blocks with colinear gene numbers  $\geq 5$ , and the statistical  
138 significance is set to be  $\leq 1 \times 10^{-10}$  estimated by ColinearScan.

139 To distinguish colinear gene blocks produced by different events,  
140 polyploidies or speciation, we estimated the synonymous nucleic acid  
141 substitution rate at the synonymous sites ( $K_s$ ), which could be used to  
142 measure divergence levels between homologous genes. The Nei-Gojobori  
143 method implemented in PAML package was used to estimate the above  
144 values<sup>[43]</sup>. Actually, homologous blocks produced by different events,  
145 especially two polyploidy events, could be mixed together due to having  
146 similar  $K_s$  values, complicated by the fact that genes evolve at divergent  
147 rates. We checked whether homologous blocks shared the chromosome  
148 breakage points, which is a hallmark to show them to have been produced  
149 by the same polyploidy event. These shared chromosome breakage points  
150 could be identified in homologous gene dotplots. When dealing with  
151 cross-species gene colienarity, orthologous genes between species often  
152 form much better gene collinearity and have much smaller  $K_s$  than the  
153 outparalogous genes do produced by polyploidy in the common ancestor.  
154 Seldom cases need to check chromosome breakage points to distinguish  
155 orthologous and outparalogous blocks. Eventually, lists of colinear genes  
156 associated with specific polyploidy events or speciation were generated  
157 and stored in the MySQL database.

## 158 **Multi-genome alignment map**

159 Multi-genome alignment maps were constructed by integrating lists of  
160 colinear genes between any two species. A reference genome was  
161 selected, and then another plant genomes were aligned to it one by one,  
162 with colinear genes as markers. Eventually, a table containing aligned  
163 colinear genes was produced, and a gene in the reference genome often  
164 has no corresponding homolog in another genome or in the duplicated  
165 regions, the corresponding cell in the table were filled with dots.

## 166 **Local colinear alignment**

167 Local colinear alignment was constructed by integrating the list of  
168 colinear genes among species. We used a Python script to call the  
169 integration package Matplotlib module, built a two-dimensional atlas to  
170 show gene homology information. Based on the genome comparison  
171 software MCSanX[44] , we developed the "Local colinear alignment"  
172 module. Compared to previous databases, by checking chromosome  
173 breakage points, GGDB can distinguish subgenomes produced by  
174 genome doubling. After receiving the query data and parameters sent  
175 from the web interface, the GGDB server queries the colinear gene results  
176 in the database and draws the local colinear alignment figure. The final  
177 result file is to be packaged and sent to the browser in PDF format.



178 **Gene evolutionary tree**

179 To help explore the evolution of duplicated genes, which is critical in  
180 genetic innovation, we used phylogenetic analysis software IQTREE,  
181 MUSCLE, and FASTTREE<sup>[45-47]</sup>, to construct an evolutionary tree using  
182 DNA or protein sequences of a set of homologous genes. Actually,  
183 previous research found that duplicated genes, especially those produced  
184 by polyploidies, could form trees inconsistent to their real evolutionary  
185 relationship<sup>[48]</sup>. For a set of homologous genes, we can construct the  
186 expected tree reflecting the actual relationship of colinear genes,  
187 including paralogs produced by specific polyploidies, and orthologs  
188 originated from speciation.

189 After accepting the user query parameters (Selected species, reference  
190 species, Gene ID) from the browser, the GGDB server queries the  
191 database for the homologous colinear genes and writes the gene  
192 sequences into a fasta file. The file is used as input for the software  
193 MUSCLE to do sequence alignment, and then a tree is built by using  
194 FASTTREE<sup>[49; 50]</sup>. Default parameters of these software were used. Both  
195 the sequence-alignment derived tree and the expected tree are stored in  
196 nwk format, convenient for the user download and further editing. The  
197 software EChart plug-in is implemented in JavaScript in our interface,  
198 and the interaction between the user and the server is realized<sup>[51; 52]</sup>.

## 199 **Construction and content**

200 We developed the GGDB database to provide homologous  
201 colinear gene information within each of or between Gramineae  
202 plants. The database is currently installed on the CentOS operating  
203 system. It has a three-tier architecture, namely, the client tier, the  
204 middle tier and the database tier. The client layer that users  
205 directly access is developed using PHP and JavaScript. In the  
206 database layer, GGDB-related data is stored in a MySQL database.  
207 The middle tier receives HTTP requests and is processed by a  
208 Apacheweb server. In addition, we include different levels of  
209 genomic colinearity analysis tools (Fig.2).

## 210 **Overview of data**

211 At present, GGDB contains the information of colinear genes  
212 within a genome and between the genomes of 29 Gramineae plants.  
213 A referring outgroup, pineapple, is also included to help explore  
214 gene evolution, especially infer real evolutionary relationship of  
215 genes. As the original input data, three types of files are used:  
216 coding sequence files, protein sequence files, and general feature  
217 format (GFF) files containing chromosome sequence annotation  
218 data.

## 219 **Colinearity data**

220 A polyploidy whole-genome duplication (WGD) event common to all

221 main lineages of Gramineae (cWGD) was dated to 96 million years ago  
222 based on putatively neutral DNA substitution rates between duplicated  
223 genes<sup>[53]</sup>. Some species are further affected by another polyploid (mWGD)  
224 event. We analyzed the colinearity of pineapple and 29 species of  
225 Gramineae, made 784 comparisons between the two species, and finally  
226 generated 784 colinear lists. Then all the colinear lists are summarized  
227 into colinear tables with reference to 29 species.

228 Based on homologous correspondence and colinearity analysis  
229 between genomes, we obtained the homologous information of various  
230 species of Gramineae (Table 2; Supplemental table 1-4). The homologous  
231 regions are detected under the threshold of 5, 10, 20, and 50 colinear  
232 genes, respectively. Paralogous and orthologous genes are associated with  
233 polyploidy events. For example, There are 20763 homologous genes in  
234 maize genome, of which 13134 paralogous genes produced by the  
235 mWGD, and 7629 paralogous genes produced by the cWGD (Table  
236 3; Supplemental table 5). Between rice and maize, there are 26947  
237 orthologous genes, and 12600 outparalogous genes produced by the  
238 cWGD.

### 239 **Overview of the interface**

240 On the home page of GGDB, we marked out the geographical  
241 originating locations of 29 Gramineae species on a world map<sup>[54]</sup>. An  
242 interactive evolution tree including the above species is also provided on

243 the home page. The chart interface on the home page provides interactive  
244 view of chromosomes from all species, including the numbers and  
245 lengths of chromosomes from each species and the numbers of genes on  
246 each chromosome. In addition, we use bar charts and line charts to  
247 display the chromosome numbers of each species, which makes it easier  
248 for users to compare their differences. These interactive charts can be  
249 downloaded.

### 250 **Species information page**

251 We provide a web page for each Gramineae species, showing basic  
252 information about its name (Latin name, common name, Chinese name),  
253 picture, classification, profile (geographical distribution, biological  
254 characteristics, living habits), genome information (genome size,  
255 chromosome information, number of genes, numbers of genes located on  
256 chromosomes, number of scaffolds, length of scaffold N50), etc. We  
257 provide hyperlinks to sequencing literature for each species. Users are  
258 allowed to download DNA sequence files, protein sequence files, and  
259 general feature format (GFF) files. These species web pages can shorten  
260 the data collection time for researchers, and the format-consistent files  
261 provides convenience for following genomics research.

262

### 263 **Homologous gene dotplotting**

264 Homologous gene dotplotting module is provided to show  
265 chromosome-level homology within a genome or between genomes.

266 A homologous dotplot can be directly derived from the BLAST  
267 result (Fig. 3A), which contains relatively full information of genomic  
268 homology, as compared to the other dotplots shown below. A color  
269 scheme for gene-pair dots is adopted to separate the best-matched,  
270 often representing orthologs while comparing different genomes,  
271 and secondarily matched, and the other matched homologs.

272 A homologous gene dotplot can be drawn by using information  
273 of inferred colinear genes and the  $K_s$  values between them (Fig. 3B).  
274 A color-scheme representing varied  $K_s$  values makes it easy to  
275 separate colinear blocks produced by different evolutionary event.  
276 Owing to the mWGD, a sorghum chromosome corresponds to two  
277 overlapping maize chromosome regions. In the meantime, it  
278 matched the other rather smaller homologous regions in maize  
279 produced due to the cWGD. Through the comparison of multiple  
280 sets of data, it is found that the cWGD of Gramineae can be  
281 distinguished from the extra whole-genome duplication in  $K_s=0.65$ .  
282 According to the  $K_s$  value of the regions, the four homologous  
283 regions of maize were divided into two groups corresponding to  
284 different whole-genome duplication events, and each group of  
285 regions was divided in detail according to the continuity of  
286 chromosome regions.

287

## 288 **Ks distribution**

289 We provide a module to show Ks distribution between colinear  
290 genes. The peak of Ks between colinear genes in each species can  
291 help identify WGD event(s), for example, two Ks peaks produced  
292 be the maize colinear genes correspond to the occurrence of two  
293 WGD events affecting its evolution. The Ks peaks of colinear  
294 genes between genomes correspond to the occurrence time of  
295 species differentiation and more ancient WGD event(s), e.g., the  
296 two peaks of Ks in sorghum-maize colinear genes correspond to  
297 their speciation event and the cWGD, respectively.

298

## 299 **Tools**

300 This section includes tools for comparative genomics analysis to  
301 visualize gene colinearity and phylogeny.

### 302 **Pairwise gene colinearity**

303 The pairwise gene colinearity module can show gene colinearity at  
304 the chromosome level or at the gene level. In the chromosome level  
305 module, users select reference species and the other compared species, to  
306 find their chromosome-level homology. The colinearity at the  
307 chromosome level can help infer whether the species has experienced  
308 WGDs and/or distinguish the duplicated genes produced by events. In the  
309 gene level module, users submit an interested gene ID, select the

310 reference species, and the other compared species, to produce an  
311 alignment of local regions. This can help find genomic changes,  
312 homologous/neighboring gene loss, DNA inversion, etc, related to the  
313 interested gene.

#### 314 **Multi-genome colinearity list**

315 The multi-genome colinear list module can produce the colinear  
316 lists generated for the species under study. There are two types of  
317 lists, with one type showing only orthologous genes between  
318 species and the other also including (out)paralogs. Users can select  
319 the reference genome and the other genomes to map onto the  
320 former to show multiple-genome alignment. In addition, we  
321 provide a variety of export formats, including excel, pdf, and csv,  
322 and copy and print functions.

#### 323 **Multi-genome colinearity alignment map**

324 The multi-genome colinearity map module is used to produce the  
325 alignment map for selected species. Users can choose any of the 29  
326 species as reference species for comparative analysis, and maps can also  
327 be in two types, corresponding to colinearity lists shown above. With the  
328 module, a joint multi-species genome alignment map can be drawn (Fig.  
329 4B).

#### 330 **Multi-genome local colinearity**

331 The multi-genome local colinearity module provides the function of

332 drawing colinear maps in homologous regions of multiple species (Fig.  
333 4C). Users select a reference species, enter an interested gene ID in the  
334 colinear list of the reference species, select the species names that needs  
335 to be compared to the reference species, and then generate a PDF format  
336 figure.

### 337 **Homologous gene evolution tree**

338 The homologous gene evolution tree module can construct a gene  
339 evolutionary tree corrected by gene coinearity information. The user  
340 selects the reference species and a gene ID, selects the species to compare  
341 to. Two gene trees will be generated at the resulting interface, a tree  
342 based on pure sequence alignment, and the other one corrected by gene  
343 colinearity(Fig. 4D; Fig. 4E).

344 Actually, we found 46% of maize genes have elevated their  
345 evolutionary rates and resulted in weird phylogeny. By retrieving maize  
346 genes and their orthologous and colinear genes from sorghum, foxtail  
347 millet, rice, and weeping lovegrass (taken as outgroup), we constructed  
348 7014 evolutionary trees and found that in 46% (3231) trees the maize  
349 genes seemed to have elevated rates (Supplemental fig. 1). In trees with  
350 one mWGD paralog, with the other one likely lost or relocated to other  
351 genomic regions, 38% (1778) showed elevated rates. In 1453 trees with  
352 two mWGD paralogs, 29% have both genes to have elevated rates and 69%  
353 to have only one gene to have elevated rates. These findings may be



354 explained by the instability of the maize genome after the mWGD .

355 **Help interface**

356 In the help interface, we provide the researcher with a detailed  
357 GGDB user manual. Users can view detailed parameter  
358 descriptions and instructions for each function in this interface.

359

360

## 361 **DISCUSSION**

362 Grameneae plants have been recursively affected by polyploidization,  
363 which makes their genome much complex to decipher<sup>[55; 56]</sup>. Owing to this  
364 fact, gene collinearity inference in present databases is not well related to  
365 each polyploidization event, which holds back the research to understand  
366 gene function origination and innovation. Actually, the appearance and  
367 establishment of novel gene functions can often be related the production  
368 and divergence of duplicated genes, the most of which were produced by  
369 ancestral polyploidization<sup>[57; 58]</sup>. Here, by separating duplicated genes  
370 produced by different polyploidization, and separating orthologous genes  
371 from outparalogous when comparing different species, we set up the  
372 GGDB to store event-related collinear genes in 29 Grameneae plants and  
373 one outgroup. The related work is intense in that 420 pairwise  
374 comparisons have been done between genomes and eventually  
375 hierarchically constructed multiple comparisons by selecting reference  
376 genomes in each major groups, subfamilies or genus. To separate  
377 homologs produced by different events involved, computational analysis  
378 of their divergence and artificial identification of complement  
379 homologous blocks aroused by chromosome breakages were performed.

380 The present database provided friendly tools for the users to show  
381 pairwise or multiple genome alignment in the global or local levels,

382 and produce lists of homologous genes, related to evolutionary  
383 events, which provides opportunities to perform deep study of their  
384 evolution and functional innovation. Figures of homologous gene  
385 dotplots, alignment of selected genomes, and evolutionary trees of  
386 selected genes can be downloaded for further research on genome  
387 structural changes, chromosome rearrangements, gene losses, and  
388 gene functional evolution.

389 In that different copies of homologous genes have divergent  
390 evolutionary rates<sup>[59; 60]</sup>, we provided a module to correct evolutionary  
391 trees constructed purely using sequence alignment, by using information  
392 of gene colinearity and shared evolutionary events. Actually, elevated  
393 evolutionary rates were observed in considerable percentages of  
394 paralogous genes produced by polyploidization<sup>[48; 53]</sup>, which often resulted  
395 in aberrant evolutionary trees that cannot be corrected by selecting  
396 methods to construct the trees. The tree correction module provides a  
397 means to make a realistic tree for the researchers to manipulate for their  
398 further study of gene evolution and functional innovation.

399 In the future, with more and more genome sequences released,  
400 we will continue to add new genome data in the GGDB. We also  
401 encourage users to submit their new Gramineae sequencing data  
402 sets to the GGDB to enrich and improve the database. GGDB will

403 act as a comparative genomics platform for genomics research of  
404 Gramineae and the other related Monocotyledons.

## 405 FIGURES

406

407

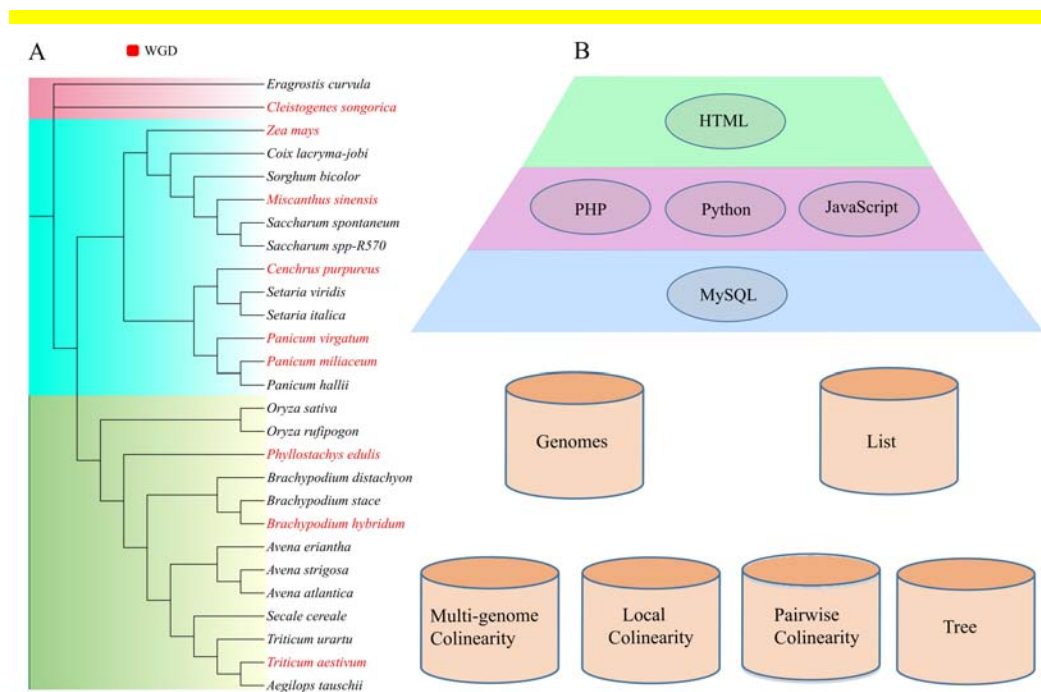

408

409 **Figure 1** Composition structure of GGDB database. A. A phylogenetic tree of  
410 Gramineae species involved in the database; B. the computer languages used to set up  
411 tiers of the database and the functional interfaces.

412

413

414

415

416

417

418

419

420

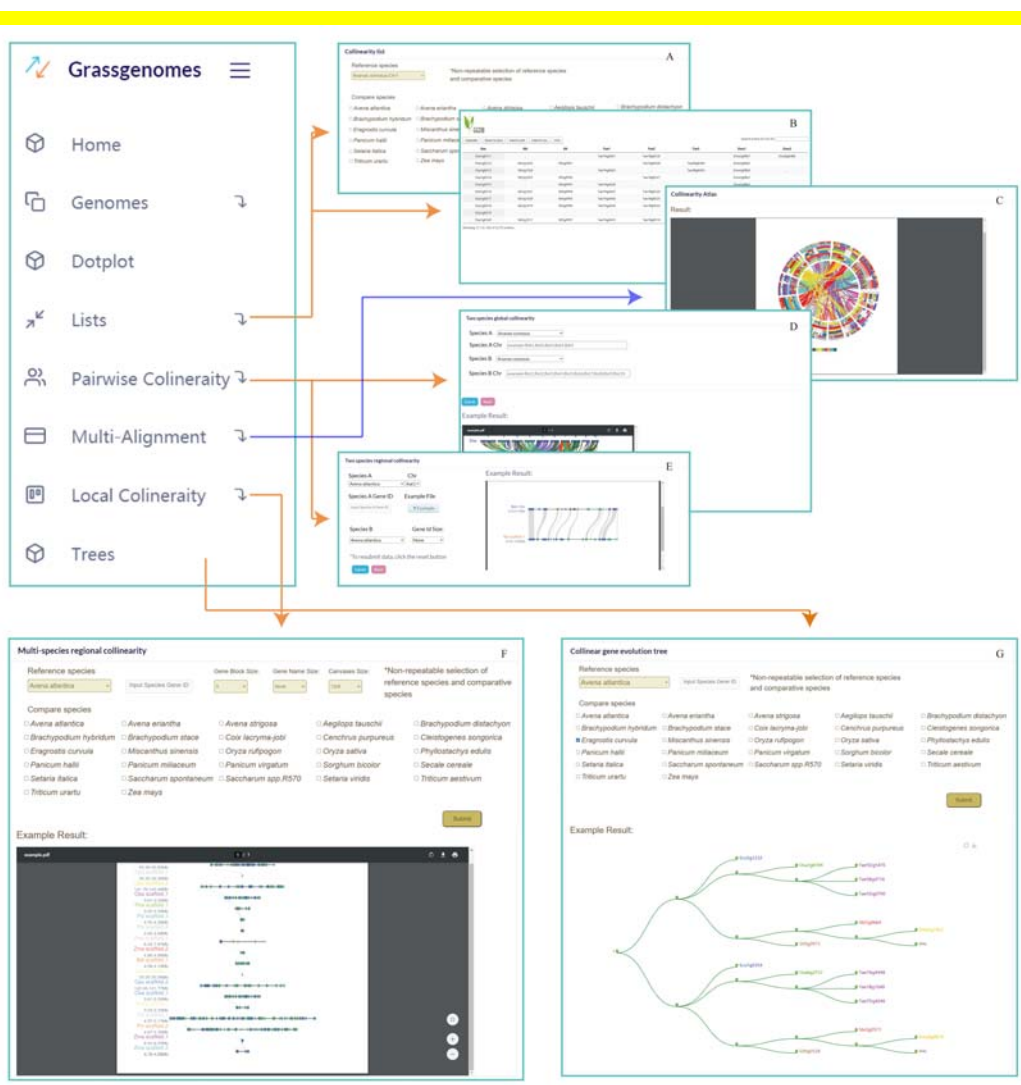

421

422 **Figure 2.** Logical relationship of modules in the database.

423

424

425

426

427

428

429

430

431

432

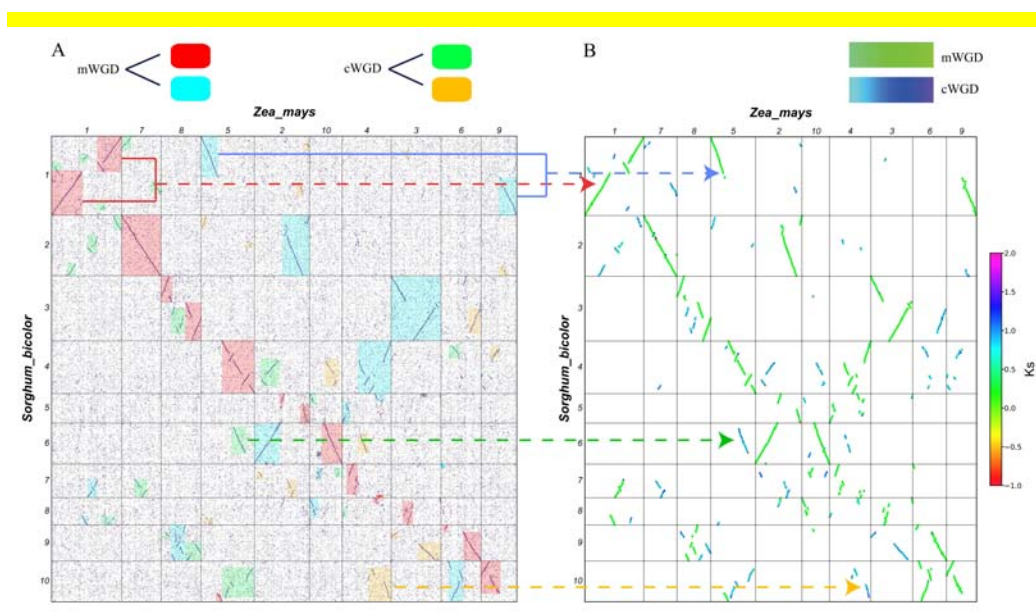

434 **Figure 3.** Evolutionary Analysis of homologous correspondence between sorghum  
435 and maize genomes. A. Homologous gene dotplot with blocks related to divergent  
436 ancestral whole-genome duplication events, the Grameneae-common one (cWGD)  
437 and the maize-specific one (mWGD); B. Inferred gene colinearity blocks, colored as  
438 the synonymous nucleotide substitution rates (Ks) and related to divergent  
439 whole-genome duplication events by colored arrows.

440

441

442

443

444

445

446

447

448

449

450

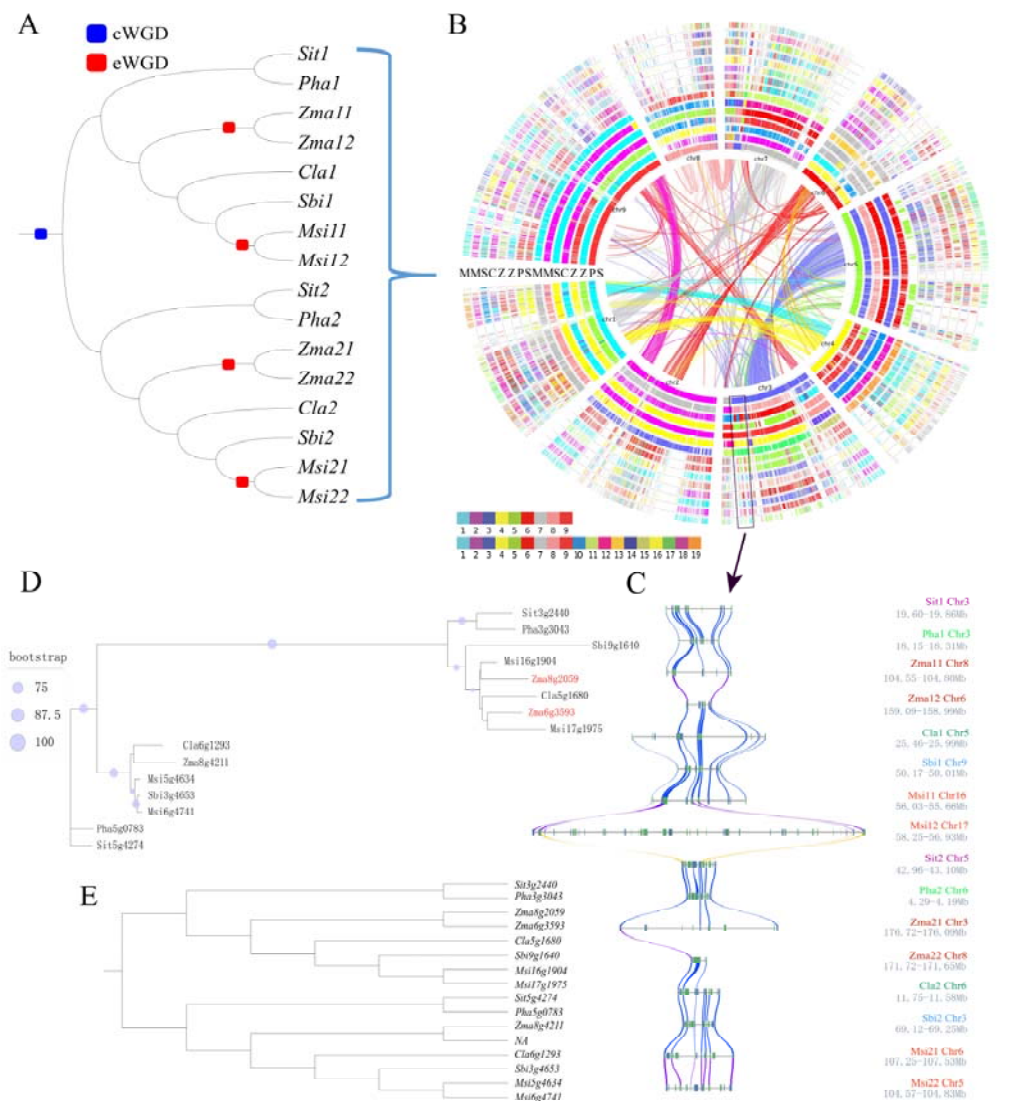

451

452

453 **Figure 4.** Multi-genome colinearity analysis. A. An expected gene tree of colinear  
 454 homologs from selected species. Besides a common whole-genome duplication  
 455 (cWGD), some species have been further affected by extra whole-genome  
 456 duplications (eWGDs); *Sateria italica* (Sit), *Panicum hallii* (Pha), *Zea mays* (Zma),  
 457 *Sorghum bicolor* (Sbi), *Miscanthus sinensis* (Msi), and *Coix lachryma* (Cla) are  
 458 involved; B. Multi-genome alignment at a genome level; C. Multi-genome alignment  
 459 in local homologous regions with millet as the reference; D. A tree based on pure  
 460 sequence alignment; E. A corrected tree based on by gene colinearity information.

461

462 **TABLES**

463

464

**Table 1. 29 plants currently involved in the GGDB**

| <b>Species name</b>            | <b>Common name</b>           | <b>Release version</b> | <b>Gene number</b> |
|--------------------------------|------------------------------|------------------------|--------------------|
| <i>Avena atlantica</i>         | <i>Avena atlantica</i>       | Version 1.0 (Nov 2019) | 45724              |
| <i>Avena eriantha</i>          | <i>Avena eriantha</i>        | Version 1.0 (Nov 2019) | 46234              |
| <i>Avena strigosa</i>          | Oats                         | Version 1.0 (May 2021) | 39812              |
| <i>Aegilops tauschii</i>       | Secundum                     | Version 1.0 (May 2021) | 59569              |
| <i>Brachypodium distachyon</i> | Purple falsebrome            | Version 3.0 (Feb 2010) | 37797              |
| <i>Brachypodium hybridum</i>   | <i>Brachypodium hybridum</i> | Version 1.1 (Jul 2020) | 80980              |
| <i>Brachypodium stace</i>      | <i>Brachypodium stace</i>    | Version 1.1 (Jul 2020) | 36332              |
| <i>Cenchrus purpureus</i>      | Elephant grass               | Version 1.0 (Oct 2020) | 63758              |
| <i>Cleistogenes songorica</i>  | Awnless cleistogenes         | Version 1.0 (Sep 2020) | 55318              |
| <i>Coix lachryma-jobi</i>      | Coix seed                    | Version 1.0 (May 2020) | 64296              |
| <i>Eragrostis curvula</i>      | Weeping lovegrass            | Version 1.0 (Jul 2019) | 32741              |
| <i>Miscanthus sinensis</i>     | <i>Miscanthus</i>            | Version 1.0 (Oct 2020) | 82046              |
| <i>Oryza rufipogon</i>         | <i>Oryza rufipogon</i>       | Version 1.0 (Jul 2019) | 44059              |
| <i>Oryza sativa</i>            | Rice                         | Version 7.0 (Jan 2007) | 48876              |
| <i>Oryza sativa-indica</i>     | Rice                         | Version 1.0 (Jan 2015) | 37358              |
| <i>Panicum hallii</i>          | <b>Panicum</b>               | Version 3.1 (Dec 2018) | 37542              |
| <i>Panicum miliaceum</i>       | Millet                       | Version 1.0 (Jan 2019) | 85636              |
| <i>Phyllostachys edulis</i>    | Moso bamboo                  | Version 1.0 (Oct 2018) | 49085              |
| <i>Panicum virgatum</i>        | Switchgrass                  | Version 1.0 (Jan 2021) | 129186             |
| <i>Saccharum spontaneum</i>    | Modern sugarcanes            | Version 1.0 (Oct 2018) | 67456              |
| <i>Saccharum spp-R570</i>      | Sugarcane                    | Version 1.0 (Jul 2018) | 24341              |
| <i>Secale cereale</i>          | Rye                          | Version 1.0 (Mar 2021) | 43928              |
| <i>Setaria italica</i>         | <i>Foxtail millet</i>        | Version 1.0 (Jun 2021) | 35591              |



---

|                          |                        |                        |        |
|--------------------------|------------------------|------------------------|--------|
| <i>Setaria viridis</i>   | <i>Setaria viridis</i> | Version 1.0 (Oct 2020) | 39114  |
| <i>Sorghum bicolor</i>   | Sorghum                | Version 1.0 (Nov 2018) | 39016  |
| <i>Triticum aestivum</i> | Wheat                  | Version 1.0 (Jun 2021) | 130379 |
| <i>Triticum urartu</i>   | Durum wheat            | Version 1.0 (Apr 2019) | 56809  |
| <i>Zea mays</i>          | Corn                   | Version 1.2 (Feb 2009) | 56906  |
| <i>Zea mays-MO17</i>     | Corn                   | Version 1.0 (Apr 2018) | 46530  |

---

465  
466  
467  
468  
469  
470  
471  
472  
473  
474  
475  
476  
477  
478  
479  
480  
481  
482  
483  
484  
485  
486  
487  
488  
489  
490  
491  
492  
493  
494  
495

**Table 2. List of orthologous information of some species of Gramineae**

|     | Bdi  | Msi   | Osa   | Pmi   | Pvi   | Sbi   | Sit   | Svi   | Tae   | Tur   | Zma   |
|-----|------|-------|-------|-------|-------|-------|-------|-------|-------|-------|-------|
| Bdi | \    | 30499 | 21053 | 30007 | 37465 | 19857 | 20782 | 21514 | 52530 | 13137 | 25708 |
| Msi | 2249 | \     | 27451 | 47405 | 60769 | 34149 | 29315 | 32667 | 72889 | 17040 | 41732 |
| Osa | 1144 | 2133  | \     | 32177 | 38906 | 21147 | 21397 | 22103 | 49571 | 12159 | 26025 |
| Pmi | 1397 | 3279  | 1236  | \     | 56986 | 31625 | 31097 | 29265 | 63541 | 16961 | 36356 |
| Pvi | 2654 | 5401  | 2547  | 3910  | \     | 42055 | 43185 | 45356 | 92787 | 23668 | 54055 |
| Sbi | 1327 | 2132  | 1068  | 1238  | 2456  | \     | 17520 | 21621 | 47707 | 11872 | 29369 |
| Sit | 1434 | 2269  | 1184  | 1345  | 2516  | 1353  | \     | 8954  | 47686 | 11494 | 27314 |
| Svi | 1481 | 2358  | 1227  | 1425  | 2764  | 1440  | 1398  | \     | 48844 | 12102 | 28198 |
| Tae | 2548 | 5482  | 2470  | 3560  | 6457  | 2311  | 2515  | 2630  | \     | 54123 | 40335 |
| Tur | 1406 | 2248  | 1345  | 1810  | 2991  | 1380  | 1342  | 1432  | 2979  | \     | 17563 |
| Zma | 1662 | 3265  | 1465  | 1960  | 3931  | 1590  | 1574  | 1762  | 3591  | 1822  | \     |

Note: Above the diagonal is the number of orthologs genes, and below the diagonal is the number of orthologs blocks.

496  
497  
498  
499  
500

501

**Table 3 Homologous blocks produced by different whole-genome duplication**

|       | events                          |      |     |     |                |                                |      |     |     |                |
|-------|---------------------------------|------|-----|-----|----------------|--------------------------------|------|-----|-----|----------------|
|       | Common whole-genome duplication |      |     |     |                | Extra whole-genome duplication |      |     |     |                |
|       | 5                               | 10   | 20  | 50  | Gene<br>Number | 5                              | 10   | 20  | 50  | Gene<br>Number |
| Aat   | 471                             | 275  | 95  | 39  | 5422           |                                |      |     |     |                |
| Aer   | 409                             | 242  | 101 | 39  | 4900           |                                |      |     |     |                |
| Ast   | 571                             | 282  | 96  | 46  | 6112           |                                |      |     |     |                |
| Ata   | 488                             | 412  | 91  | 17  | 5137           |                                |      |     |     |                |
| Bdi   | 547                             | 334  | 79  | 27  | 6809           |                                |      |     |     |                |
| Bhy   | 563                             | 95   | 2   | /   | 2935           | 1086                           | 602  | 273 | 153 | 50953          |
| Bst   | 511                             | 284  | 71  | 28  | 6088           |                                |      |     |     |                |
| Cla   | 780                             | 473  | 126 | 32  | 8016           |                                |      |     |     |                |
| Cpu   | 648                             | 409  | 241 | 108 | 12692          | 1375                           | 495  | 149 | 75  | 39248          |
| Cso   | 1539                            | 611  | 229 | 104 | 12363          | 325                            | 213  | 165 | 124 | 36212          |
| Ecu   | 349                             | 308  | 120 | 26  | 3800           |                                |      |     |     |                |
| Msi   | 1149                            | 472  | 136 | 12  | 9207           | 1159                           | 866  | 455 | 164 | 31517          |
| Oru   | 196                             | 114  | 28  | 7   | 2381           |                                |      |     |     |                |
| Osa   | 473                             | 291  | 85  | 34  | 7891           |                                |      |     |     |                |
| Ped   | 1132                            | 236  | 22  | /   | 7099           | 1393                           | 752  | 211 | 3   | 16349          |
| Pha   | 599                             | 361  | 92  | 35  | 8090           |                                |      |     |     |                |
| Pmi   | 883                             | 403  | 159 | 56  | 9983           | 364                            | 205  | 132 | 92  | 40148          |
| Pvi   | 1399                            | 526  | 156 | 14  | 11307          | 2214                           | 1313 | 646 | 259 | 50424          |
| Sbi   | 601                             | 334  | 98  | 43  | 7928           |                                |      |     |     |                |
| Sce   | 527                             | 331  | 62  | 19  | 4215           |                                |      |     |     |                |
| Sit   | 677                             | 340  | 86  | 33  | 8239           |                                |      |     |     |                |
| Ssp   | 693                             | 1392 | 738 | 355 | 9403           |                                |      |     |     |                |
| Ssp_R | 175                             | 113  | 63  | 32  | 2471           |                                |      |     |     |                |
| Svi   | 700                             | 398  | 104 | 33  | 8444           |                                |      |     |     |                |

---

|     |      |     |     |    |       |      |      |     |     |        |
|-----|------|-----|-----|----|-------|------|------|-----|-----|--------|
| Tae | 3043 | 957 | 382 | 73 | 16125 | 3402 | 1422 | 691 | 319 | 108771 |
| Tur | 345  | 153 | 13  | 2  | 2571  |      |      |     |     |        |
| Zma | 760  | 285 | 108 | 26 | 7629  | 392  | 224  | 131 | 58  | 13134  |

---

502

## Parsed Citations

1. Watson L, Dallwitz M J, Weiller C, et al. The grass genera of the world[J], 1992, 16(2): 151-152.  
Google Scholar: [Author Only](#) [Title Only](#) [Author and Title](#)
- [2] Sato K, Abe F, Mascher M, et al. Chromosome-scale genome assembly of the transformation-amenable common wheat cultivar 'Fielder'[J]. DNA Res, 2021, 28(3).**
3. Ouyang S, Zhu W, Hamilton J, et al. The TIGR Rice Genome Annotation Resource: improvements and new features[J]. Nucleic Acids Res, 2007, 35(Database issue): D883-7.  
Google Scholar: [Author Only](#) [Title Only](#) [Author and Title](#)
4. Hu Y, Colantonio V, Müller B S F, et al. Genome assembly and population genomic analysis provide insights into the evolution of modern sweet corn[J]. Nat Commun, 2021, 12(1): 1227.  
Google Scholar: [Author Only](#) [Title Only](#) [Author and Title](#)
5. Deschamps S, Zhang Y, Llaca V, et al. A chromosome-scale assembly of the sorghum genome using nanopore sequencing and optical mapping[J]. Nat Commun, 2018, 9(1): 4844.  
Google Scholar: [Author Only](#) [Title Only](#) [Author and Title](#)
6. Guo L, Qiu J, Han Z, et al. A host plant genome (*Zizania latifolia*) after a century-long endophyte infection[J]. Plant J, 2015, 83(4): 600-9.  
Google Scholar: [Author Only](#) [Title Only](#) [Author and Title](#)
7. Tanaka H, Hirakawa H, Kosugi S, et al. Sequencing and comparative analyses of the genomes of zoysiagrasses[J]. DNA Res, 2016, 23(2): 171-80.  
Google Scholar: [Author Only](#) [Title Only](#) [Author and Title](#)
8. Schnable J C, Springer N M, Freeling M. Differentiation of the maize subgenomes by genome dominance and both ancient and ongoing gene loss[J]. Proc Natl Acad Sci U S A, 2011, 108(10): 4069-74.  
Google Scholar: [Author Only](#) [Title Only](#) [Author and Title](#)
9. Jiao Y, Li J, Tang H, et al. Integrated syntenic and phylogenomic analyses reveal an ancient genome duplication in monocots[J]. Plant Cell, 2014, 26(7): 2792-802.  
Google Scholar: [Author Only](#) [Title Only](#) [Author and Title](#)
10. Soltis P S, Soltis D E. Ancient WGD events as drivers of key innovations in angiosperms[J]. Curr Opin Plant Biol, 2016, 30: 159-65.  
Google Scholar: [Author Only](#) [Title Only](#) [Author and Title](#)
11. Soltis P S, Marchant D B, Van De Peer Y, et al. Polyploidy and genome evolution in plants[J]. Curr Opin Genet Dev, 2015, 35: 119-25.  
Google Scholar: [Author Only](#) [Title Only](#) [Author and Title](#)
12. Zhang Y, Zheng C, Sankoff D. A branching process for homology distribution-based inference of polyploidy, speciation and loss[J]. Algorithms Mol Biol, 2019, 14: 18.  
Google Scholar: [Author Only](#) [Title Only](#) [Author and Title](#)
13. Zhang Y, Zheng C, Sankoff D. Distinguishing successive ancient polyploidy levels based on genome-internal syntenic alignment[J]. BMC Bioinformatics, 2019, 20(Suppl 20): 635.  
Google Scholar: [Author Only](#) [Title Only](#) [Author and Title](#)
14. Tang H, Bowers J E, Wang X, et al. Angiosperm genome comparisons reveal early polyploidy in the monocot lineage[J]. Proc Natl Acad Sci U S A, 2010, 107(1): 472-7.  
Google Scholar: [Author Only](#) [Title Only](#) [Author and Title](#)
15. Paterson AH, Bowers J E, Chapman B A. Ancient polyploidization predating divergence of the cereals, and its consequences for comparative genomics[J]. Proc Natl Acad Sci U S A, 2004, 101(26): 9903-8.  
Google Scholar: [Author Only](#) [Title Only](#) [Author and Title](#)
16. Bowers J E, Chapman B A, Rong J, et al. Unravelling angiosperm genome evolution by phylogenetic analysis of chromosomal duplication events[J]. Nature, 2003, 422(6930): 433-8.  
Google Scholar: [Author Only](#) [Title Only](#) [Author and Title](#)
17. Wang X, Shi X, Hao B, et al. Duplication and DNA segmental loss in the rice genome: implications for diploidization[J]. New Phytol, 2005, 165(3): 937-46.  
Google Scholar: [Author Only](#) [Title Only](#) [Author and Title](#)
18. Wang X, Tang H, Paterson AH. Seventy million years of concerted evolution of a homoeologous chromosome pair, in parallel, in major Poaceae lineages[J]. Plant Cell, 2011, 23(1): 27-37.

Google Scholar: [Author Only](#) [Title Only](#) [Author and Title](#)

19. Murat F, Xu J H, Tannier E, et al. Ancestral grass karyotype reconstruction unravels new mechanisms of genome shuffling as a source of plant evolution[J]. *Genome Res*, 2010, 20(11): 1545-57.

Google Scholar: [Author Only](#) [Title Only](#) [Author and Title](#)

20. Yuan J, Wang J, Yu J, et al. Alignment of Rutaceae Genomes Reveals Lower Genome Fractionation Level Than Eudicot Genomes Affected by Extra Polyploidization[J]. *Front Plant Sci*, 2019, 10: 986.

Google Scholar: [Author Only](#) [Title Only](#) [Author and Title](#)

21. Lovell J T, Macqueen A H, Mamidi S, et al. Genomic mechanisms of climate adaptation in polyploid bioenergy switchgrass[J]. *Nature*, 2021, 590(7846): 438-444.

Google Scholar: [Author Only](#) [Title Only](#) [Author and Title](#)

22. Zhang J, Wu F, Yan Q, et al. The genome of *Cleistogenes songorica* provides a blueprint for functional dissection of dimorphic flower differentiation and drought adaptability[J]. *Plant Biotechnol J*, 2021, 19(3): 532-547.

Google Scholar: [Author Only](#) [Title Only](#) [Author and Title](#)

23. Wei C, Wang Z, Wang J, et al. Conversion between 100-million-year-old duplicated genes contributes to rice subspecies divergence[J]. *BMC Genomics*, 2021, 22(1): 460.

Google Scholar: [Author Only](#) [Title Only](#) [Author and Title](#)

24. Liu C, Wang J, Sun P, et al. Illegitimate Recombination Between Homeologous Genes in Wheat Genome[J]. *Front Plant Sci*, 2020, 11: 1076.

Google Scholar: [Author Only](#) [Title Only](#) [Author and Title](#)

[25] Wang Y P, Tang H B, Debarry J D, et al. MCScanX: a toolkit for detection and evolutionary analysis of gene synteny and collinearity[J]. *Nucleic Acids Research*, 2012, 40(7).

26. Lee T H, Tang H B, Wang X Y, et al. PGDD: a database of gene and genome duplication in plants[J]. *Nucleic Acids Research*, 2013, 41(D1): D1152-D1158.

Google Scholar: [Author Only](#) [Title Only](#) [Author and Title](#)

27. Nelson A D L, Haug-Baltzell A K, Davey S, et al. EPIC-CoGe: managing and analyzing genomic data[J]. *Bioinformatics*, 2018, 34(15): 2651-2653.

Google Scholar: [Author Only](#) [Title Only](#) [Author and Title](#)

28. Zhuang W J, Chen H, Yang M, et al. The genome of cultivated peanut provides insight into legume karyotypes, polyploid evolution and crop domestication[J]. *Nature Genetics*, 2019, 51(5): 865-+.

Google Scholar: [Author Only](#) [Title Only](#) [Author and Title](#)

29. Wang J P, Sun P C, Li Y X, et al. An Overlooked Paleotetraploidization in Cucurbitaceae[J]. *Molecular Biology and Evolution*, 2018, 35(1): 16-26.

Google Scholar: [Author Only](#) [Title Only](#) [Author and Title](#)

30. Song X M, Sun P C, Yuan J Q, et al. The celery genome sequence reveals sequential paleo-polyploidizations, karyotype evolution and resistance gene reduction in apiales[J]. *Plant Biotechnology Journal*, 2021, 19(4): 731-744.

Google Scholar: [Author Only](#) [Title Only](#) [Author and Title](#)

31. Song X M, Wang J P, Li N, et al. Deciphering the high-quality genome sequence of coriander that causes controversial feelings[J]. *Plant Biotechnology Journal*, 2020, 18(6): 1444-1456.

Google Scholar: [Author Only](#) [Title Only](#) [Author and Title](#)

32. Zhu Y, Davis S, Stephens R, et al. GEOmetadb: powerful alternative search engine for the Gene Expression Omnibus[J]. *Bioinformatics*, 2008, 24(23): 2798-800.

Google Scholar: [Author Only](#) [Title Only](#) [Author and Title](#)

33. Zhou H, Jin J, Zhang H, et al. IntPath--an integrated pathway gene relationship database for model organisms and important pathogens[J]. *BMC Syst Biol*, 2012, 6 Suppl 2(Suppl 2): S2.

Google Scholar: [Author Only](#) [Title Only](#) [Author and Title](#)

34. Zheng W, Mutha N V, Heydari H, et al. NeisseriaBase: a specialised Neisseria genomic resource and analysis platform[J]. *PeerJ*, 2016, 4: e1698.

Google Scholar: [Author Only](#) [Title Only](#) [Author and Title](#)

35. Zhang Y, Xu B, Yang Y, et al. CPSS: a computational platform for the analysis of small RNA deep sequencing data[J]. *Bioinformatics*, 2012, 28(14): 1925-7.

Google Scholar: [Author Only](#) [Title Only](#) [Author and Title](#)

36. Zhang X, Sun X F, Cao Y, et al. CBD: a biomarker database for colorectal cancer[J]. *Database (Oxford)*, 2018, 2018.

Google Scholar: [Author Only](#) [Title Only](#) [Author and Title](#)

37. Zhang Q, Yang B, Chen X, et al. Renal Gene Expression Database (RGED): a relational database of gene expression profiles in kidney disease[J]. Database (Oxford), 2014, 2014.  
Google Scholar: [Author Only Title Only Author and Title](#)
38. Lee T H, Tang H, Wang X, et al. PGDD: a database of gene and genome duplication in plants[J]. Nucleic Acids Res, 2013, 41(Database issue): D1152-8.  
Google Scholar: [Author Only Title Only Author and Title](#)
39. Genome sequencing and analysis of the model grass *Brachypodium distachyon*[J]. Nature, 2010, 463(7282): 763-8.  
Google Scholar: [Author Only Title Only Author and Title](#)
40. Zou C, Li L, Miki D, et al. The genome of broomcorn millet[J]. Nat Commun, 2019, 10(1): 436.  
Google Scholar: [Author Only Title Only Author and Title](#)
41. Zhang J, Zhang X, Tang H, et al. Allele-defined genome of the autopolyploid sugarcane *Saccharum spontaneum* L.[J]. Nat Genet, 2018, 50(11): 1565-1573.  
Google Scholar: [Author Only Title Only Author and Title](#)
42. Wang X, Shi X, Li Z, et al. Statistical inference of chromosomal homology based on gene colinearity and applications to *Arabidopsis* and rice[J]. BMC Bioinformatics, 2006, 7: 447.  
Google Scholar: [Author Only Title Only Author and Title](#)
43. Yang Z. PAML 4: phylogenetic analysis by maximum likelihood[J]. Mol Biol Evol, 2007, 24(8): 1586-91.  
Google Scholar: [Author Only Title Only Author and Title](#)
44. Wang Y, Tang H, Debarry J D, et al. MCScanX: a toolkit for detection and evolutionary analysis of gene synteny and collinearity[J]. Nucleic Acids Res, 2012, 40(7): e49.  
Google Scholar: [Author Only Title Only Author and Title](#)
45. Edgar R C. MUSCLE: a multiple sequence alignment method with reduced time and space complexity[J]. BMC Bioinformatics, 2004, 5: 113.  
Google Scholar: [Author Only Title Only Author and Title](#)
46. Nguyen L T, Schmidt H A, Von Haeseler A, et al. IQ-TREE: a fast and effective stochastic algorithm for estimating maximum-likelihood phylogenies[J]. Mol Biol Evol, 2015, 32(1): 268-74.  
Google Scholar: [Author Only Title Only Author and Title](#)
47. Price M N, Dehal P S, Arkin A P. FastTree 2--approximately maximum-likelihood trees for large alignments[J]. PLoS One, 2010, 5(3): e9490.  
Google Scholar: [Author Only Title Only Author and Title](#)
48. Meng F, Pan Y, Wang J, et al. Cotton Duplicated Genes Produced by Polyploidy Show Significantly Elevated and Unbalanced Evolutionary Rates, Overwhelmingly Perturbing Gene Tree Topology[J]. Front Genet, 2020, 11: 239.  
Google Scholar: [Author Only Title Only Author and Title](#)
49. Liu K, Linder C R, Warnow T. RAxML and FastTree: comparing two methods for large-scale maximum likelihood phylogeny estimation[J]. PLoS One, 2011, 6(11): e27731.  
Google Scholar: [Author Only Title Only Author and Title](#)
50. Fouquier J, Rideout J R, Bolyen E, et al. Ghost-tree: creating hybrid-gene phylogenetic trees for diversity analyses[J]. Microbiome, 2016, 4: 11.  
Google Scholar: [Author Only Title Only Author and Title](#)
51. Wang R, Perez-Riverol Y, Hermjakob H, et al. Open source libraries and frameworks for biological data visualisation: a guide for developers[J]. Proteomics, 2015, 15(8): 1356-74.  
Google Scholar: [Author Only Title Only Author and Title](#)
52. Yachdav G, Wilzbach S, Rauscher B, et al. MSASviewer: interactive JavaScript visualization of multiple sequence alignments[J]. Bioinformatics, 2016, 32(22): 3501-3503.  
Google Scholar: [Author Only Title Only Author and Title](#)
53. Wang X, Wang J, Jin D, et al. Genome Alignment Spanning Major Poaceae Lineages Reveals Heterogeneous Evolutionary Rates and Alters Inferred Dates for Key Evolutionary Events[J]. Mol Plant, 2015, 8(6): 885-98.  
Google Scholar: [Author Only Title Only Author and Title](#)
54. Zuloaga F O, Salariao D L, Scataglini A. Molecular phylogeny of *Panicum* s. str. (Poaceae, Panicoideae, Paniceae) and insights into its biogeography and evolution[J]. PLoS One, 2018, 13(2): e0191529.  
Google Scholar: [Author Only Title Only Author and Title](#)
55. Mckain M R, Tang H, Mcneal J R, et al. A Phylogenomic Assessment of Ancient Polyploidy and Genome Evolution across the Poales[J]. Genome Biol Evol, 2016, 8(4): 1150-64.

Google Scholar: [Author Only](#) [Title Only](#) [Author and Title](#)

**56. Ma P F, Liu Y L, Jin G H, et al. The Pharus latifolius genome bridges the gap of early grass evolution[J]. Plant Cell, 2021, 33(4): 846-864.**

Google Scholar: [Author Only](#) [Title Only](#) [Author and Title](#)

**57. Cheng F, Wu J, Cai X, et al. Gene retention, fractionation and subgenome differences in polyploid plants[J]. Nat Plants, 2018, 4(5): 258-268.**

Google Scholar: [Author Only](#) [Title Only](#) [Author and Title](#)

**58. Wang X, Gowik U, Tang H, et al. Comparative genomic analysis of C4 photosynthetic pathway evolution in grasses[J]. Genome Biol, 2009, 10(6): R68.**

Google Scholar: [Author Only](#) [Title Only](#) [Author and Title](#)

**59. Chalhou B, Denoeud F, Liu S, et al. Plant genetics. Early allopolyploid evolution in the post-Neolithic Brassica napus oilseed genome[J]. Science, 2014, 345(6199): 950-3.**

Google Scholar: [Author Only](#) [Title Only](#) [Author and Title](#)

**60. The tomato genome sequence provides insights into fleshy fruit evolution[J]. Nature, 2012, 485(7400): 635-41.**

Google Scholar: [Author Only](#) [Title Only](#) [Author and Title](#)

## **AVAILABILITY**

**The GGDB can be accessed through the web server at <http://www.grassgenome.com/>.**
